# Supplementary material
Source: publisher figshare collection journal article supplement (https://gsajournals.figshare.com/articles/dataset/_/14185070)
Supplement: Supplementary file 1 [file 1]

### SnAmy1

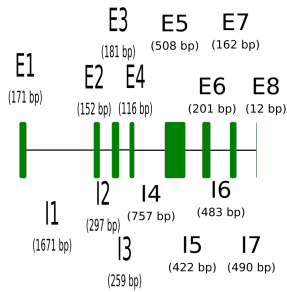

### SnAmy2

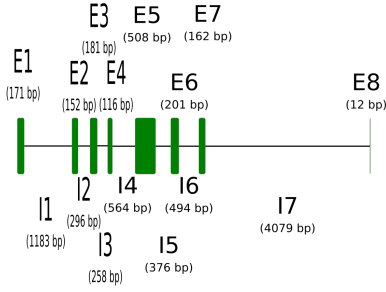

### SnAmy3

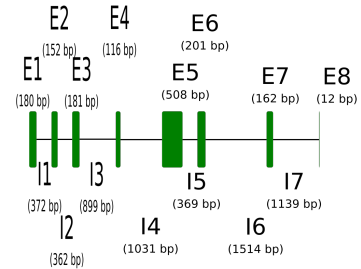

### HaAmy2

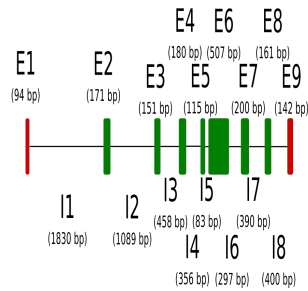

1000 bp

**Figure S8. Map of *Sesamia nonagrioides* alpha-amylase gene copies.** The exon/intron structure of *S. nonagrioides* alpha-amylases (*SnAmy1-3* on top), as inferred from our tblastn search, is compared to that of *Helicoverpa armigera* alpha-amylase 2 (*HaAmy2*, bottom). The *SnAmy1* and *SnAmy2* genes are both located on scf7180000017447\_1 (from position 112,199 to 118,080) and from position 56,757 to 48,005, respectively) and *SnAmy3* on scf7180000016148\_1 from position 307,554 to 300,359. Coding exons are in green and non-coding exons are in red. Introns and exons are drawn to scale. Incomplete versions of the three *SnAmy* copies were retrieved by our automatic annotation (SNONA2\_00013269, SNONA2\_00013268 and SNONA2\_00007091).
