# Supplementary material
Source: publisher figshare collection journal article supplement (https://gsajournals.figshare.com/articles/dataset/_/14185070)
Supplement: Supplementary file 4 [file 1]

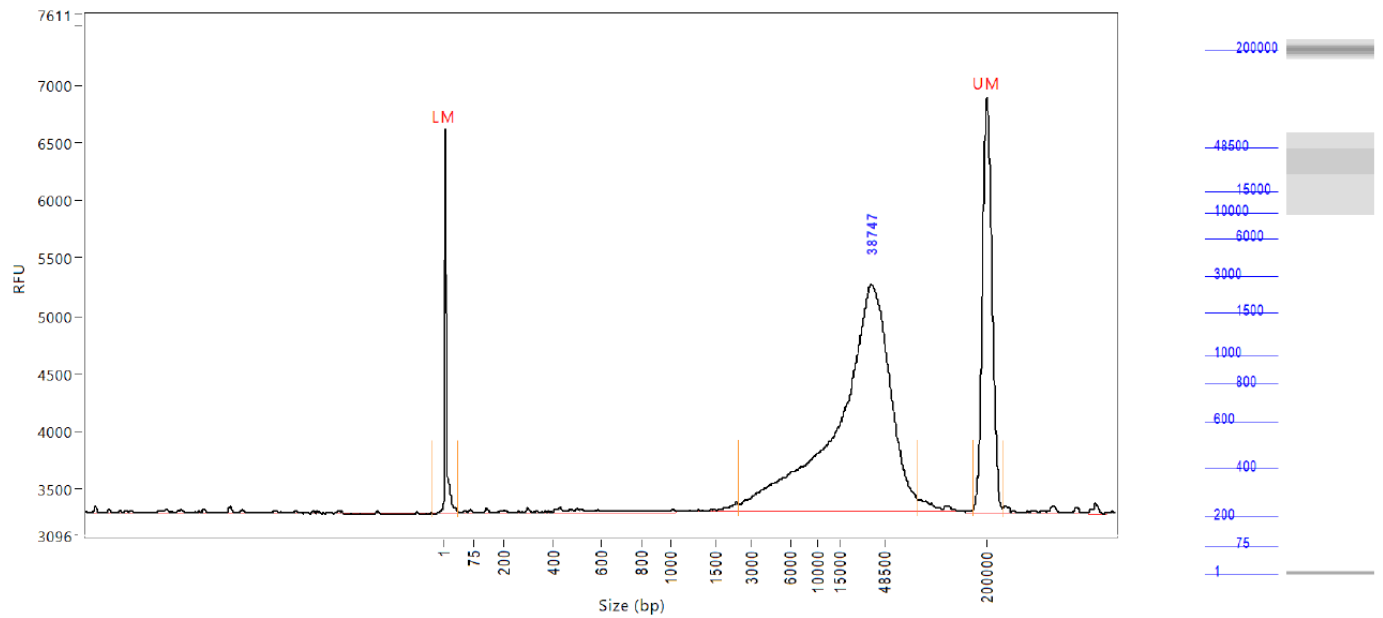

**Figure S1. Electropherogram and its corresponding gel generated by a fragment analyzer.** The electropherogram shows the relative fluorescence units (RFU) as a function of the size of the DNA fragments (in bp). The lower maker (LM) is 1 bp-long and the upper marker (UP) is 200 kb-long. The DNA extraction of *S. nonagrioides* contains large fragments, where most of the fragments are around 38,747 bp-long. The spectrophotometer measure gave a value of 1.9 for the ratio 260/280 and a value of 2.24 for the ratio 260/230.
