# Supplementary material
Source: publisher figshare collection journal article supplement (https://gsajournals.figshare.com/articles/dataset/_/14185070)
Supplement: Supplementary file 5 [file 1]

## Sndsx

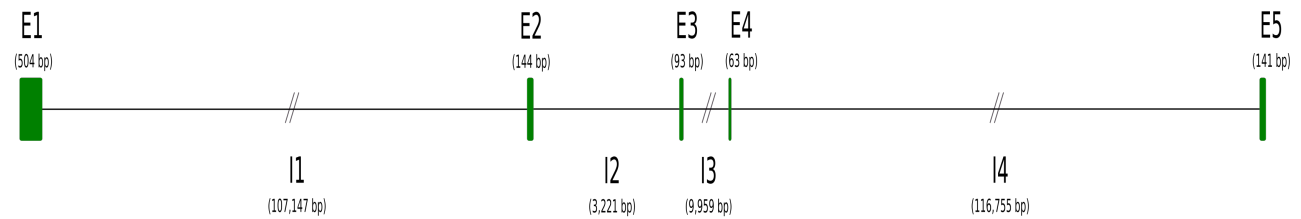

## Bmdsx F+M

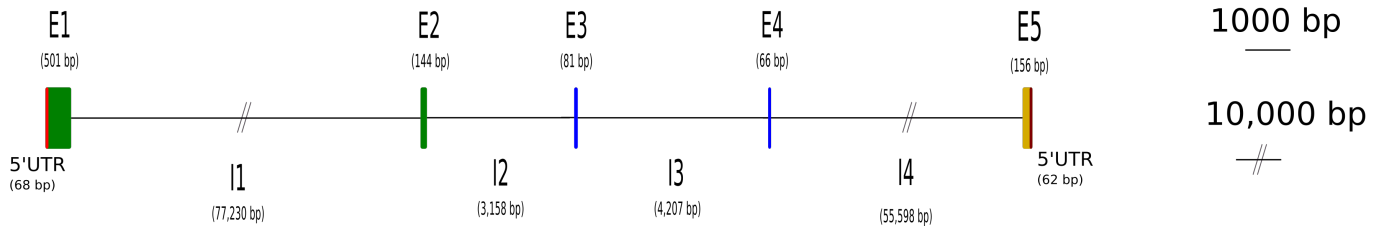

**Figure S5. Map of *Sesamia nonagrioides doublesex*.** The exon/intron structure of *S. nonagrioides dsx* (*Sndsx* on top), as inferred from our tblastn search, is compared to that of *Bombyx mori dsx* (*Bmdsx* bottom). Coding exons are in green and non-coding exons are in red. Introns and exons are drawn to scale. Introns interrupted with two parallel bars have a scale divided by ten. *Bmdsx* is on a region of about 199 kb, with five exons (two specific to the female isoform in blue and one specific to the male isoform in yellow). The BmdsxF protein encoded by the female isoform is 262 aa long with four coding exons (Ncbi: NP\_001036871.1). The BmdsxM protein encoded by the male isoform is 266aa long with three coding exons (Ncbi: NP\_001104815). *Sndsx* is located on scf7180000016138\_1 (from position 728,330 to 966,406).
