# Supplementary material
Source: publisher figshare collection journal article supplement (https://gsajournals.figshare.com/articles/dataset/_/14185070)
Supplement: Supplementary file 6 [file 1]

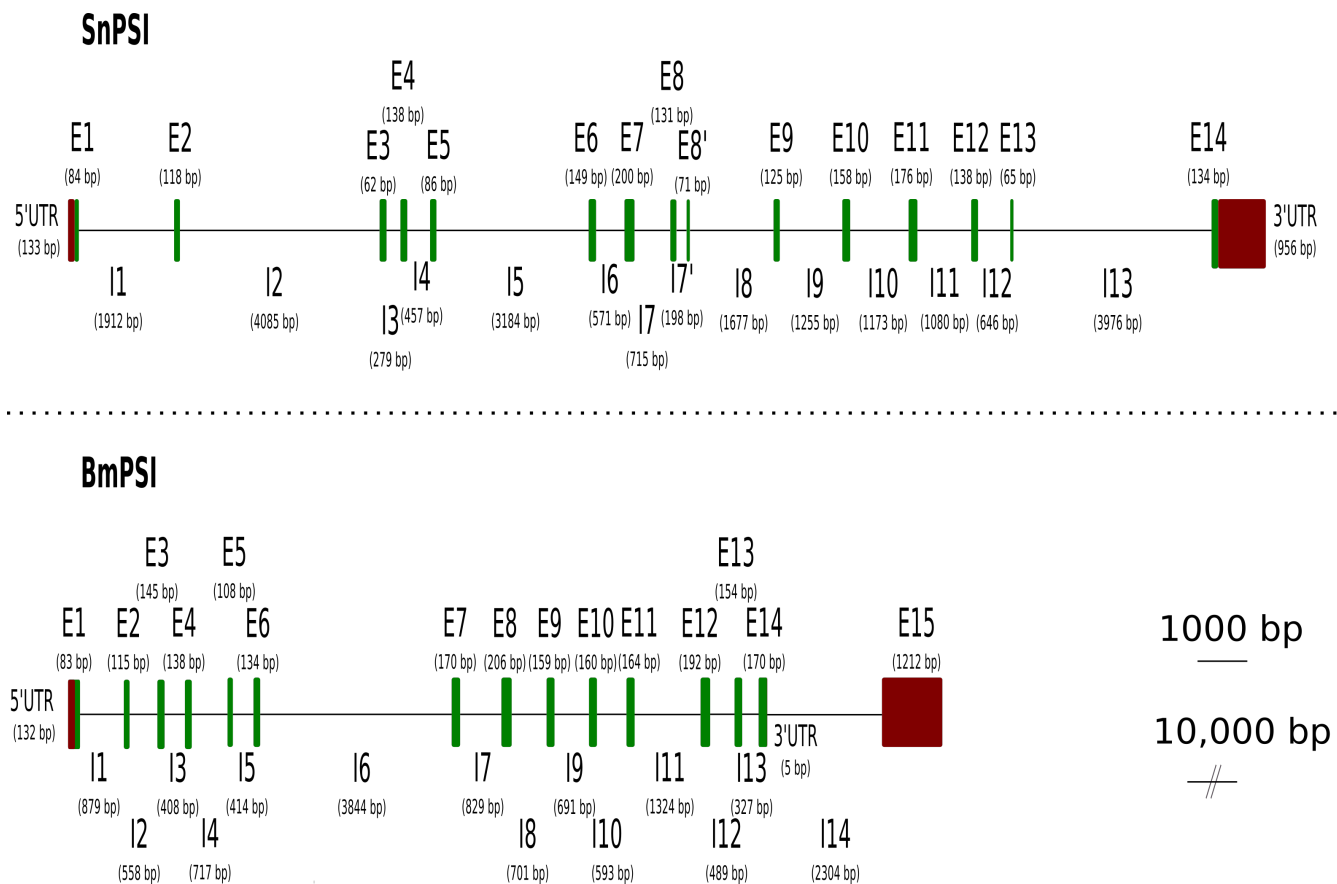

**Figure S7. Map of *Sesamia nonagrioides* PSI.** The exon/intron structure of *S. nonagrioides* PSI (*SnPSI* on top), as inferred from our tblastn search and automatic gene prediction, is compared to that of *Bombyx mori* PSI (*BmPSI* bottom). Coding exons are in green and non-coding exons are in red. Introns and exons are drawn to scale. The BmPSI protein is 703-aa long and it is encoded on a gene of about 17.5kb with 15 exons (Ncbi: NP\_001103813.1). The *SnPSI* gene is located on scf7180000023208\_1 (from position 2,458,092 to 2,434,311), and it was automatically annotated as FUBP1, which is 23.7 kb with 13 predicted exons (SNONA2\_00000052 3). The *SnPSI* predicted protein is 537 aa and it is 56.22% identical to BmPSI. Exon 8 of BmPSI protein mapped in two hits, leading to an additional exon (exon 8') in *SnPSI*.
