# Supplementary material
Source: publisher figshare collection journal article supplement (https://gsajournals.figshare.com/articles/dataset/_/14185070)
Supplement: Supplementary file 7 [file 1]

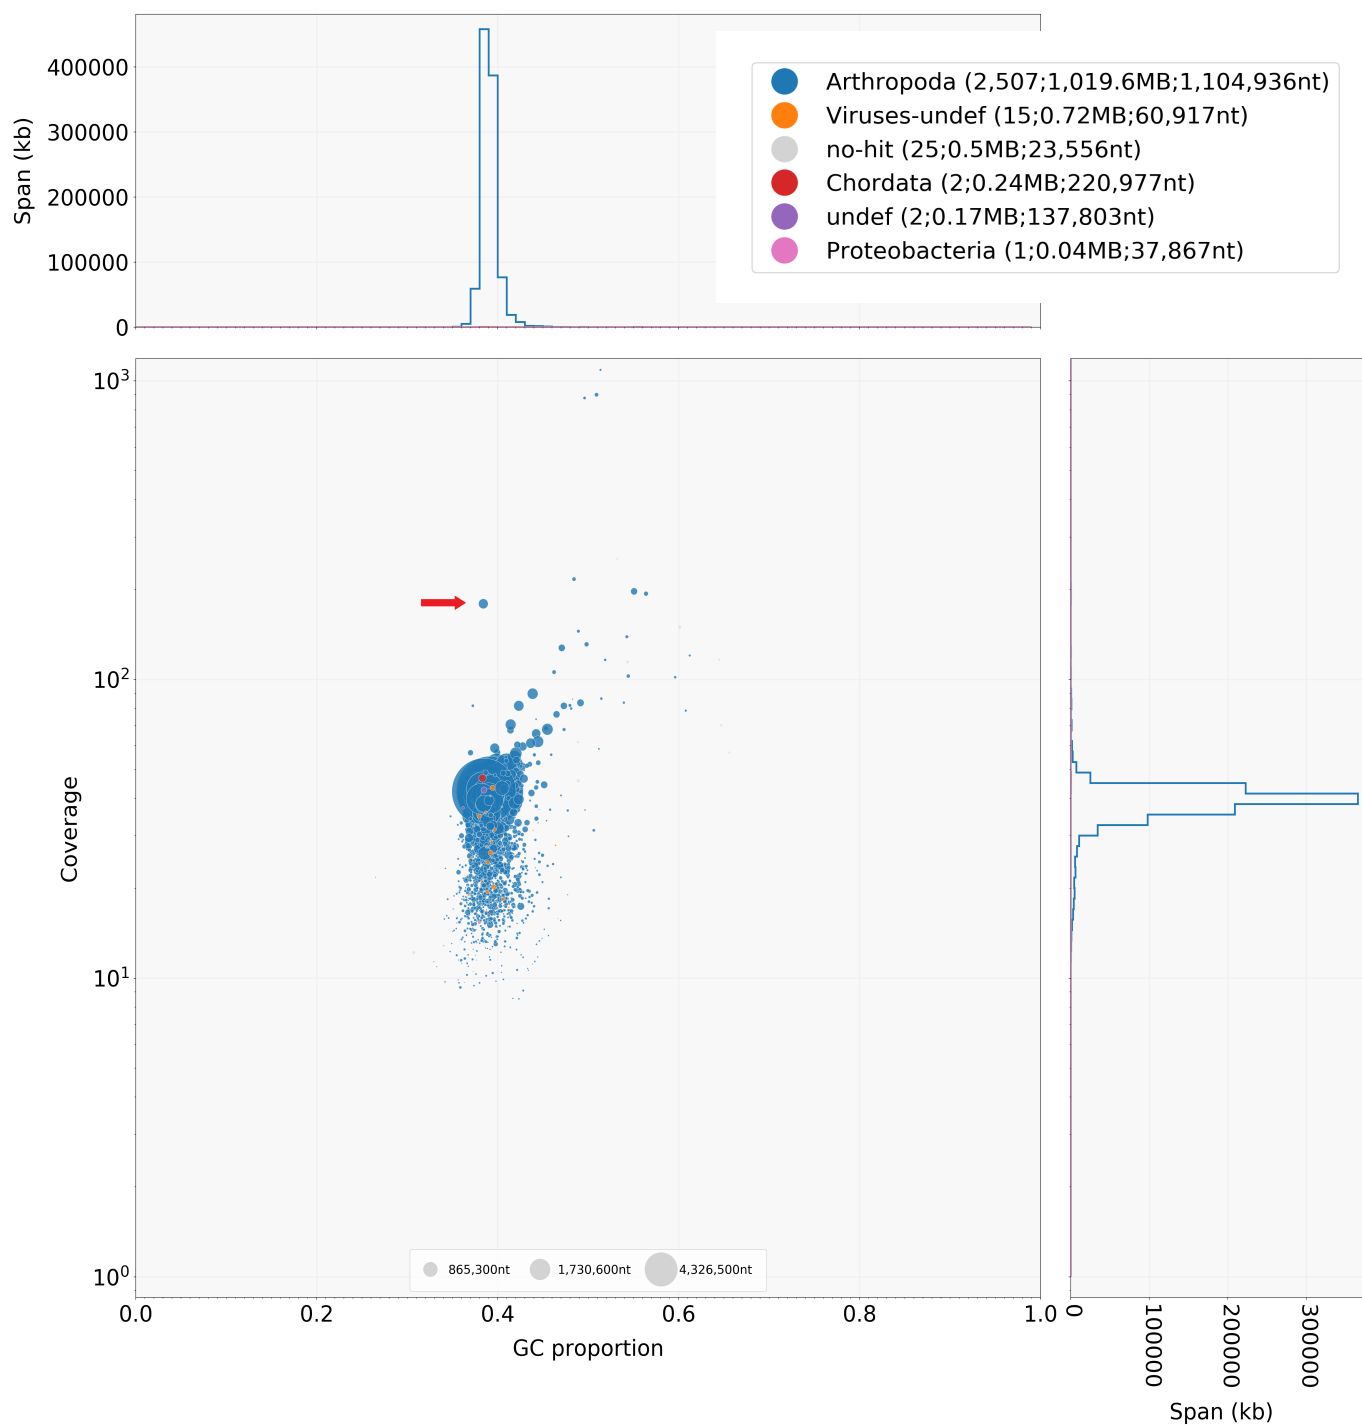

**Figure S3. Blobplot of the *Sesamia nonagrioides* final genome assembly.** Each circle represents a Scaffold. Circle's diameters are scaled proportionally to scaffold length and coloured according to taxonomic affiliation. The blue dot highlighted by a red arrow (387,794 bp long scaffold with a coverage of 154.8X) is scf7180000018078\_1, which contains large NUMTs (see Figure 2).
